# Supplementary material for: Two-dimensional BiTeX crystals with persistent luminescence induced by photochemical reactions
Source: Royal Society of Chemistry journal article supplement (doi:10.1039/d4nr04824e), 2025-01-01
Supplement: d4nr04824e1.pdf [file d4nr04824e1.pdf]

## Two-dimensional BiTeX Crystal with Persistent Luminescence Induced by Photochemical Reaction

Jiajing Wu<sup>1\*</sup>, Pengjia Zhu<sup>2</sup>, Fei Meng<sup>2</sup>, Juntao Dong<sup>2</sup>, Xiao Yan<sup>1</sup>, Zhenlong Tu<sup>1</sup>, Zheng-Jie Chen<sup>3</sup>,  
Xuexia Lan<sup>4</sup>, Lili Zhang<sup>4</sup>, Tao Zhang<sup>4</sup>, Jian Zheng<sup>4</sup>, Xinzhong Wang<sup>1</sup>, Jing Peng<sup>3,4\*</sup>

<sup>1</sup>Institute of Information Technology, Shenzhen Institute of Information Technology, Shenzhen, 518172, China

<sup>2</sup>The fifth engineering co., LTD of China Railway Seventh Group, Zhengzhou, 450009, China

<sup>3</sup>Faculty of Materials Science and Energy Engineering, Shenzhen University of Advanced Technology, Shenzhen, 518107, China

<sup>4</sup>Low dimensional Energy Materials Research Center, Institute of Technology for Carbon Neutrality, Shenzhen Institute of Advanced Technology, Chinese Academy of Sciences, Shenzhen, 518055 P. R. China.

\*Corresponding Authors: Jiajing Wu, Jing Peng

\*E-mail: [wujj@szit.edu.cn](mailto:wujj@szit.edu.cn), [jing.peng@siat.ac.cn](mailto:jing.peng@siat.ac.cn)

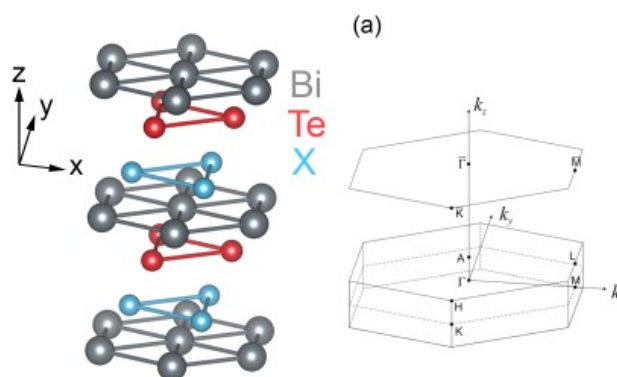

**Figure S1.** BiTeX (X = Cl, Br, I) is a layered van der Waals material in which Te layers, Bi layers, and X layers are alternately stacked along the c-axis direction.

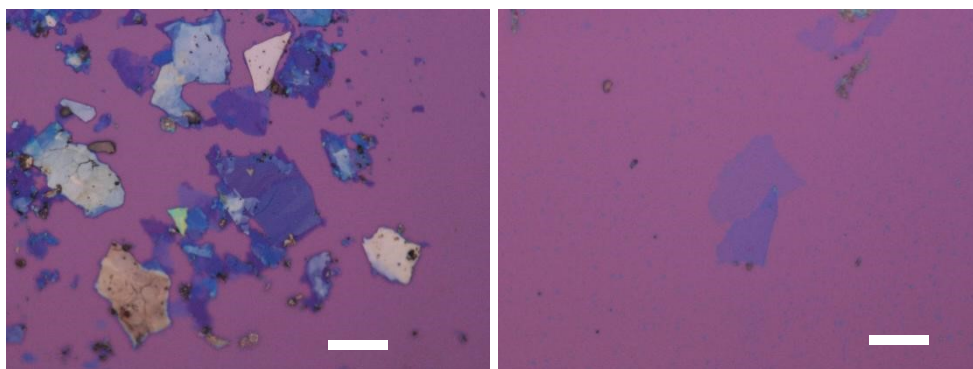

**Figure S2.** BiTeI (left) and BiTeCl (right) nanosheets on SiO<sub>2</sub>/Si substrate under optical microscope, with inset scale bar 20  $\mu\text{m}$  and 10  $\mu\text{m}$ , respectively.

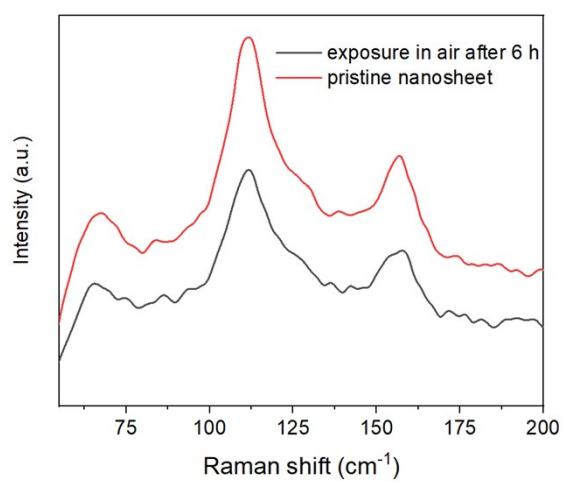

**Figure S3.** The stability of BiTeBr nanosheet characterized by Raman spectra.

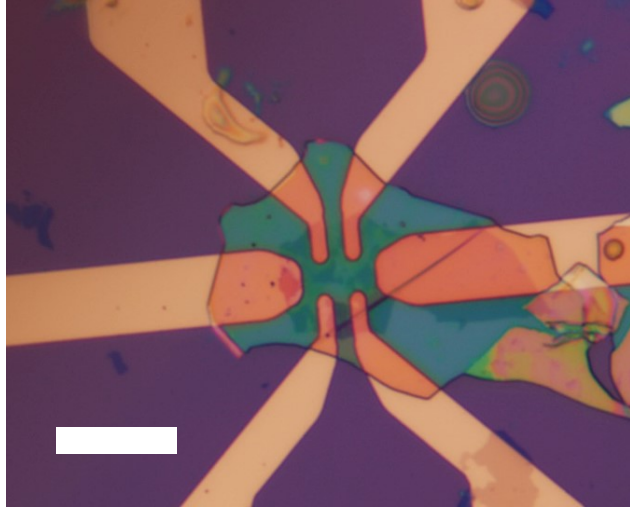

**Figure S4.** The nanodevice images of BiTeBr nanosheets with BN capped. The inset scale bar is 20  $\mu\text{m}$ .

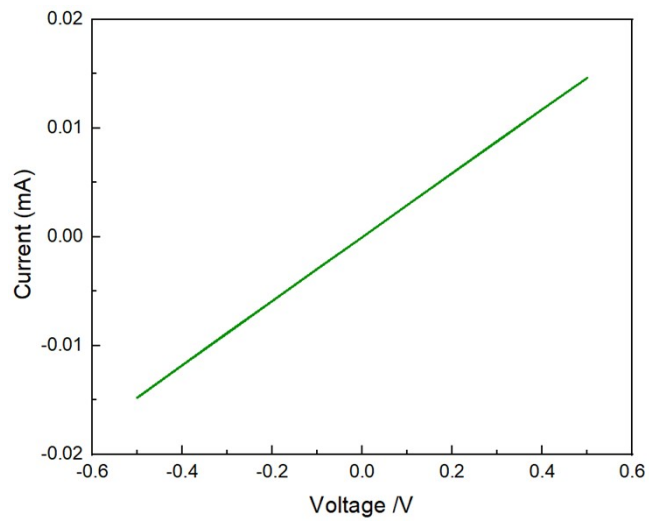

**Figure S5.** I-V curves of BiTeBr nanosheets nanodevice test with two electrodes.

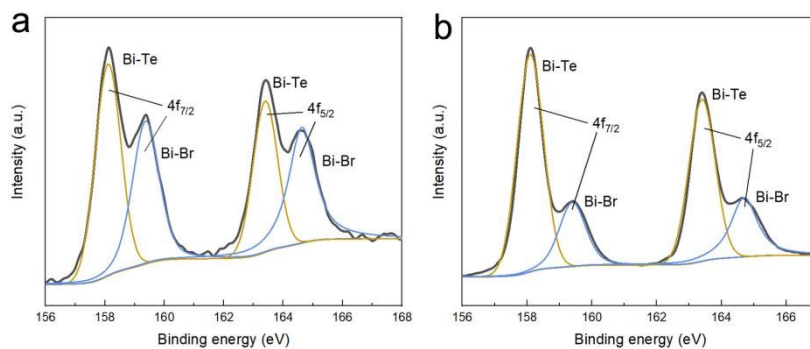

**Figure S6.** The XPS analysis of Bi 4f peak for BiTeBr nanosheet (a) before and (b) after UV light irradiation.

**Table 1.** Atomic ratios for BiTeBr nanosheet under EDS mapping of TEM.

| Element | wt%    | atomic ratio |
|---------|--------|--------------|
| O       | 4.51   | 30.12        |
| Br      | 14.18  | 18.97        |
| Te      | 28.62  | 23.97        |
| Bi      | 52.69  | 26.94        |
| total   | 100.00 | 100.00       |
